# Supplementary material for: PSMA PET for the Evaluation of Liver Metastases in Castration-Resistant Prostate Cancer Patients: A Multicenter Retrospective Study
Source: MDPI journal article supplement (doi:10.3390/cancers14225680), 2022-11-18
Supplement: s1 [file s1]

**SUPPLEMENTAL MATERIAL**

**Table S1.** PSMA-PET for CRPC staging categorized by PCWG3 clinical subtype and PROMISE stage.

|                              | <b>PSMA-PET (%)</b> | <b>Liver metastases confirmed<br/>at reference standard (%)</b> |
|------------------------------|---------------------|-----------------------------------------------------------------|
|                              | <b>n = 60</b>       | <b>n = 24</b>                                                   |
| <b>Non-metastatic</b>        | 5 (8)               | 1 (4)                                                           |
| <b>Local (T/Tr only)</b>     | 4 (7)               | 2 (8)                                                           |
| <b>Nodal (N1/M1a ± T/Tr)</b> | 10 (17)             | 1 (4)                                                           |
| N1 only                      | 3 (5)               | -                                                               |
| M1a only                     | 3 (5)               | 1 (4)                                                           |
| <b>Bone (any M1b)</b>        | 19 (32)             | 5 (21)                                                          |
| <b>Visceral (any M1c)</b>    | 22 (37)             | 15 (63)                                                         |
| Liver                        | 17 (28)             | 14 (58)                                                         |

**Table S2.** Logistic regression model for predicting presence of liver metastases.

|                         | $\beta$ | SE $\beta$ | OR    | 95% CI        | p value   |
|-------------------------|---------|------------|-------|---------------|-----------|
| <b>(Costant)</b>        | -2.024  | 0.580      | na    | na            | p < 0.001 |
| <b>PSA PET (ng/mL)*</b> | 0.029   | 0.012      | 1.03  | 1.01 – 1.06   | p = 0.019 |
| <b>PSMA-PET result</b>  | 3.048   | 0.829      | 21.09 | 4.67 – 128.56 | p < 0.001 |

**Notes:** na=not available.

\* PSA outliers were excluded (n=2).

**Table S3.** CT (n=6) and PSMA-PET (n=35) radiomic features predicting presence of liver metastases at univariate analysis model (only p<0.05 are shown).

| CT                        |          | PSMA-PET             |          |                        |          |                                           |          |                                    |          |                                     |          |                     |          |
|---------------------------|----------|----------------------|----------|------------------------|----------|-------------------------------------------|----------|------------------------------------|----------|-------------------------------------|----------|---------------------|----------|
|                           | p value  |                      | p value  |                        | p value  |                                           | p value  |                                    | p value  |                                     | p value  |                     |          |
| Sphericity                | 0.000823 | Surface Volume Ratio | 0.003094 | Total Energy           | 0.026237 | Gray Level Variance .1                    | 0.030874 | Difference Average                 | 0.036195 | Inverse Variance                    | 0.042278 | Large Area Emphasis | 0.045631 |
| Surface Volume Ratio      | 0.005208 | Sphericity           | 0.004498 | Gray Level Variance .2 | 0.028475 | Busyness                                  | 0.031711 | Mean Absolute Deviation            | 0.04016  | Long Run High Gray Level Emphasis   | 0.043372 | Idm                 | 0.046797 |
| Elongation                | 0.04428  | Cluster Prominence   | 0.016222 | Contrast               | 0.030056 | Difference Entropy                        | 0.035257 | Strength                           | 0.04016  | High Gray Level Zone Emphasis       | 0.043372 | Id                  | 0.047988 |
| Kurtosis                  | 0.045409 | Complexity           | 0.018744 | Maximum                | 0.030056 | Cluster Tendency                          | 0.035257 | High Gray Level Emphasis           | 0.041208 | Autocorrelation                     | 0.044489 | Entropy             | 0.047988 |
| Maximum 2D Diameter Slice | 0.046616 | Sum Squares          | 0.023494 | Gray Level Variance    | 0.030874 | Range                                     | 0.035257 | Short Run High Gray Level Emphasis | 0.041208 | Small Area High Gray Level Emphasis | 0.044489 | Zone Variance       | 0.049205 |
| 10 Percentile             | 0.04757  | Difference Variance  | 0.025528 | Variance               | 0.030874 | Small Dependence High Gray Level Emphasis | 0.036195 | High Gray Level Run Emphasis       | 0.041208 | Sum Entropy                         | 0.045631 |                     |          |

**Table S4.** Low correlated radiomic features included in the multivariate analyses.

| CT low correlated features  |                    |
|-----------------------------|--------------------|
| 2                           | Sphericity         |
| 4                           | 10Percentile       |
| PET low correlated features |                    |
| 1                           | SurfaceVolumeRatio |
| 2                           | Autocorrelation    |
| 3                           | ZoneVariance       |

**Table S5.** High correlated radiomic features.

| <b>CT high correlated features</b>  |                                      |
|-------------------------------------|--------------------------------------|
| 1                                   | SurfaceVolumeRatio                   |
| 2                                   | Maximum2DDiameterSlice               |
| 3                                   | Elongation                           |
| 4                                   | Kurtosis                             |
| <b>PET high correlated features</b> |                                      |
| 1                                   | GrayLevelVariance.2                  |
| 2                                   | GrayLevelVariance.1                  |
| 3                                   | GrayLevelVariance                    |
| 4                                   | Variance                             |
| 5                                   | SumSquares                           |
| 6                                   | Entropy                              |
| 7                                   | SmallDependenceHighGrayLevelEmphasis |
| 8                                   | MeanAbsoluteDeviation                |
| 9                                   | SmallAreaHighGrayLevelEmphasis       |
| 10                                  | ClusterTendency                      |
| 11                                  | SumEntropy                           |
| 12                                  | HighGrayLevelZoneEmphasis            |
| 13                                  | ShortRunHighGrayLevelEmphasis        |
| 14                                  | HighGrayLevelEmphasis                |
| 15                                  | HighGrayLevelRunEmphasis             |
| 16                                  | LongRunHighGrayLevelEmphasis         |
| 17                                  | TotalEnergy                          |
| 18                                  | ClusterProminence                    |
| 19                                  | Busyness                             |
| 20                                  | Contrast                             |
| 21                                  | DifferenceVariance                   |
| 22                                  | DifferenceAverage                    |
| 23                                  | DifferenceEntropy                    |
| 24                                  | Maximum                              |
| 25                                  | Complexity                           |
| 26                                  | Range                                |
| 27                                  | Id                                   |
| 28                                  | Strength                             |
| 29                                  | Idm                                  |
| 30                                  | InverseVariance                      |
| 31                                  | LargeAreaEmphasis                    |
| 32                                  | Sphericity                           |

**Figure S1.** Patient-based analysis of the localization of liver metastases, according to liver segments and reference standard. Percentages indicate the proportion of study patients in whom liver metastases were localized within the respective liver segment.

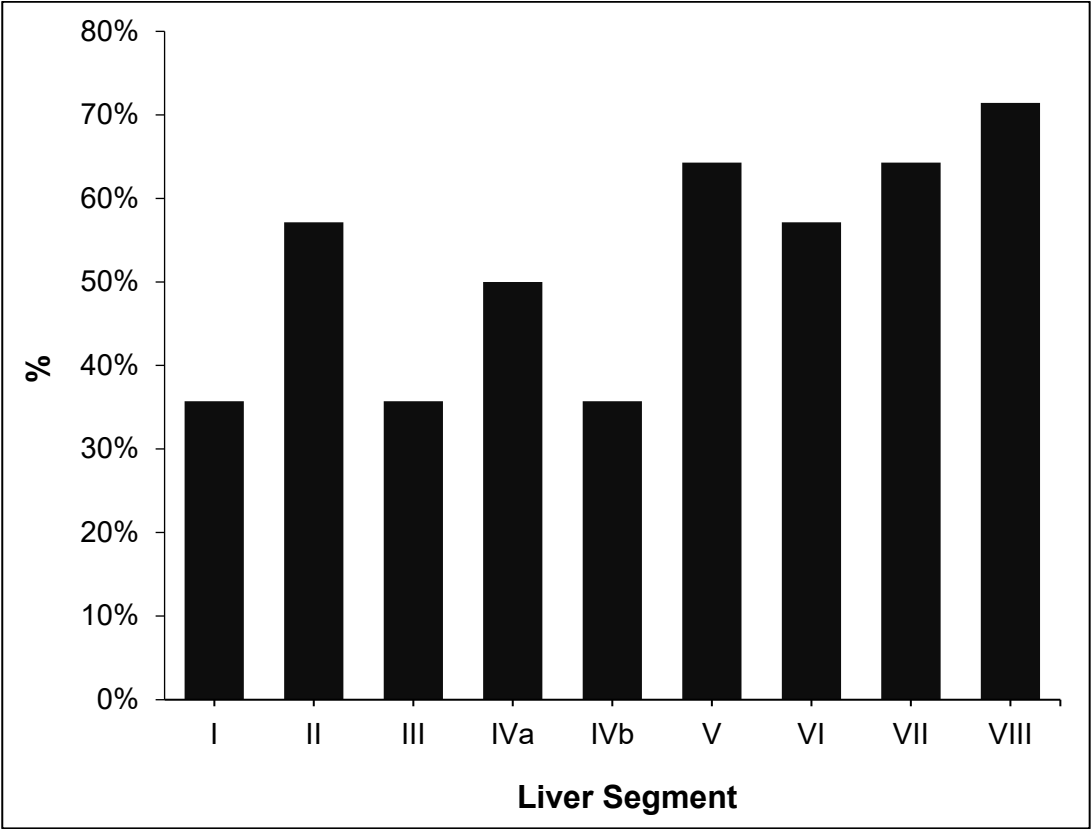

**Figure S2.** Boxplots displaying distribution of Gleason score sum, PSA at time of PSMA-PET and number of previous lines of therapy for CRPC and presence (1) or absence (0) of liver metastases at reference standard.

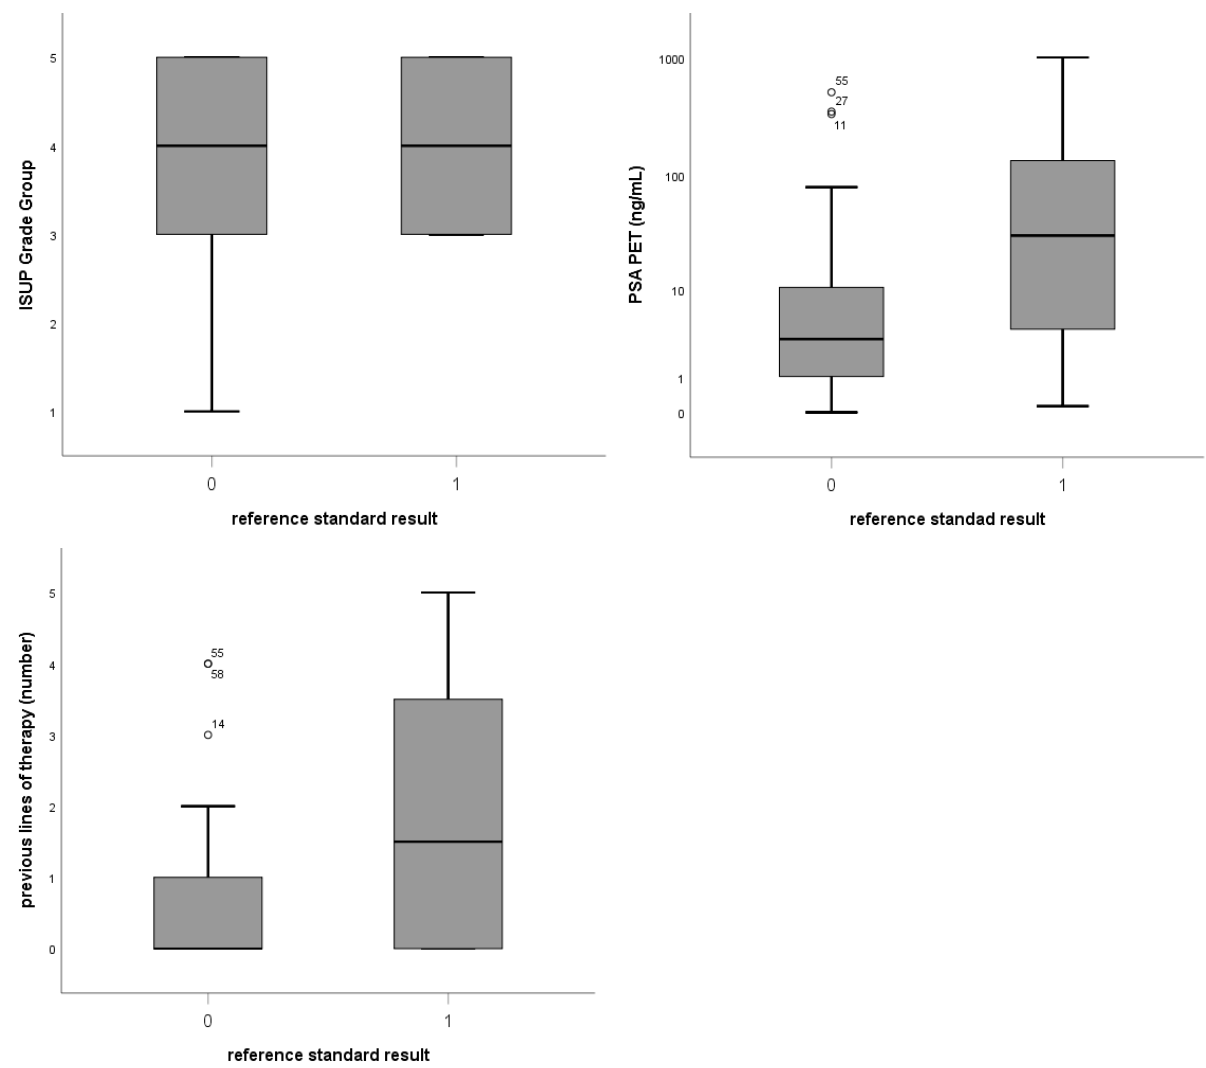

**Notes:** 0 = negative reference standard for liver metastases; 1 = positive reference standard for liver metastases.

**Figure S3.** PSMA-PET positivity rate on patient basis stratified by PSA and number of lesions.

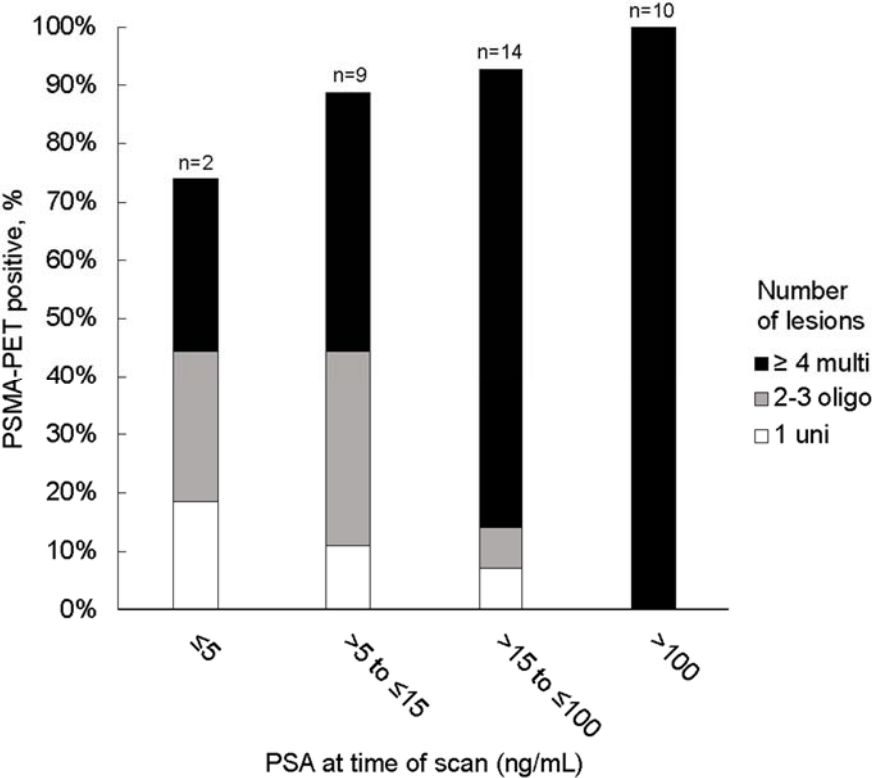



**Figure S4.** Case example of false positive PSMA-PET for liver metastases.

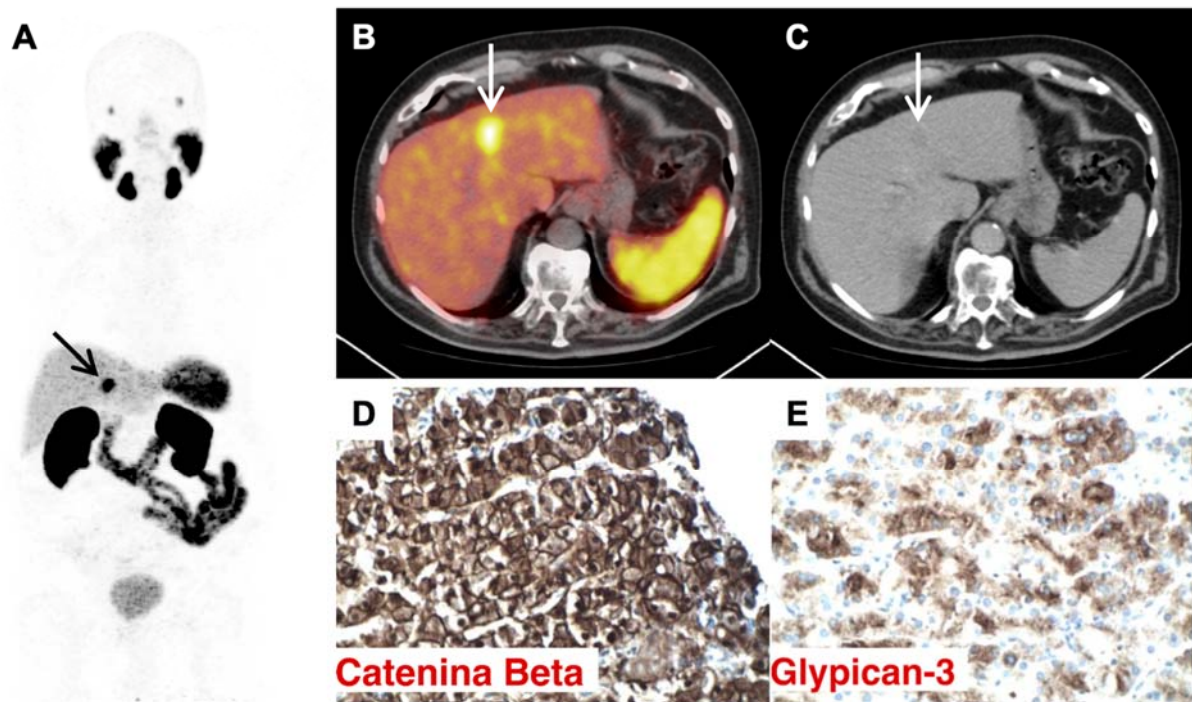

82-year-old man diagnosed with high-risk PC treated with radical prostatectomy and pelvic lymph node dissection in 2018, pT3a pN0, R1, ISUP 3. Hormonal therapy was started with progression under treatment and diagnosis of CRPC. Due to an increasing PSA, he underwent a PSMA-PET in July 2020 with PSA of 0.14 ng/mL. Focal PSMA uptake was demonstrated in the IV hepatic segment (A and B), whereas the low-dose CT-part of the scan showed a hypodense area (C). With known PET-information, the patient underwent a multi-phase CT. Histopathology performed five months later showed the presence of a well-differentiated hepatocarcinoma with ki-67 of 10%, positive for Catenina Beta (D), Glypican-3 (E), Arginase-1 and Glutamine synthetase.

**Figure S5.** Correlation analysis for significant CT **(a)** and PSMA-PET radiomic features **(b)**. Cut-off was set at 0.6.
